# Supplementary material
Source: PubMed Central journal article supplement (PMC6679737)

Figure 1a

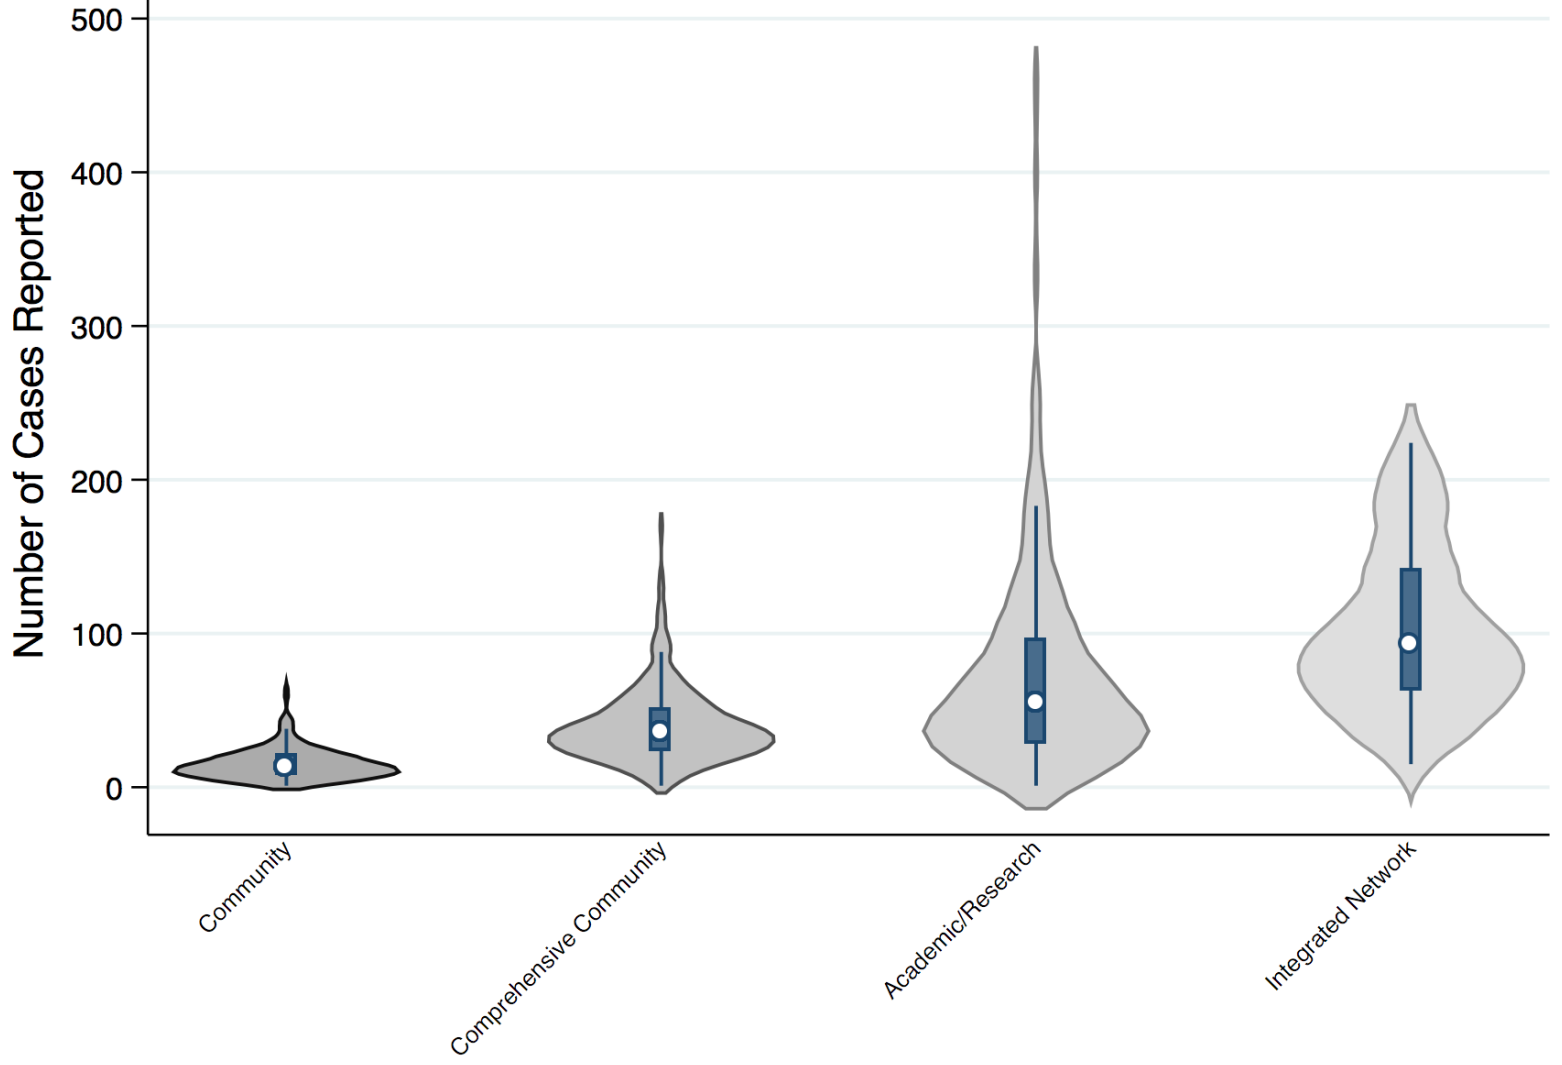

Supplement: NIHMS1529402-supplement-3.pdf [file NIHMS1529402-supplement-3.pdf]

Figure 1b

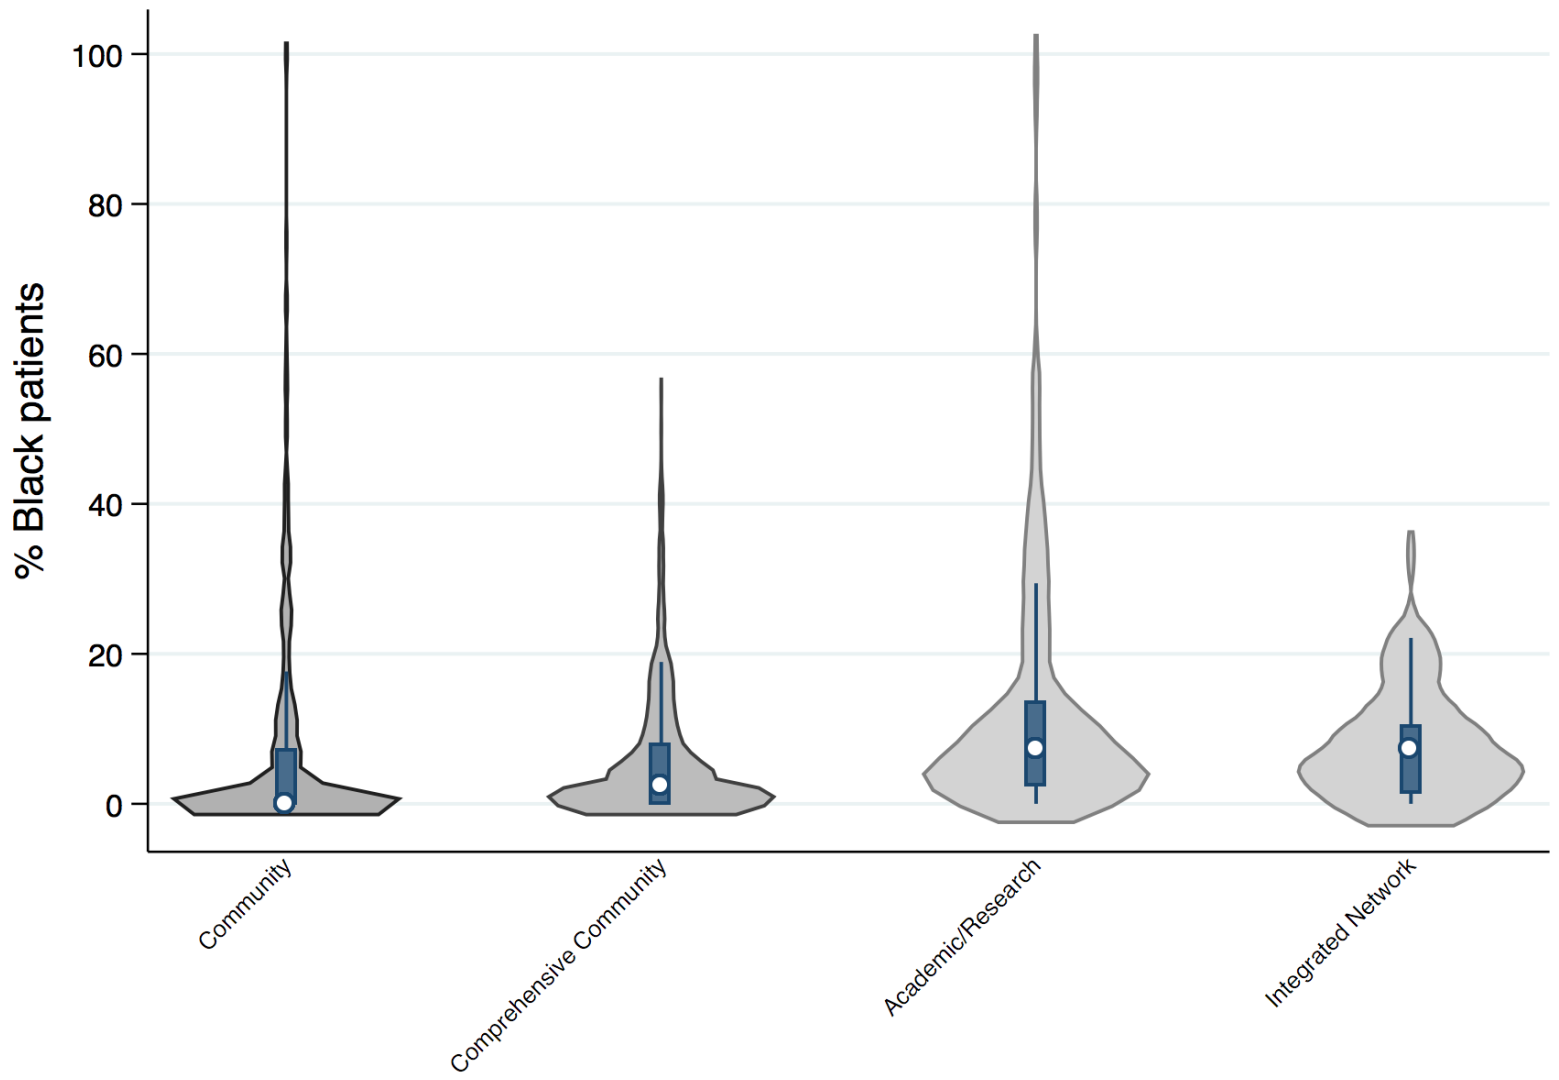

Supplement: NIHMS1529402-supplement-4.pdf [file NIHMS1529402-supplement-4.pdf]
